# Supplementary material for: Difference in Incontinence Pad Use between Patients after Radical Prostatectomy and Cancer-Free Population with Subgroup Analysis for Open vs. Minimally Invasive Radical Prostatectomy: A Descriptive Analysis of Insurance Claims-Based Data
Source: MDPI journal article supplement (doi:10.3390/ijerph18136891), 2021-06-27
Supplement: s1 [file s1]

## S1 Methods and Materials

We first identified dates and specific diagnoses using ICD codes for PCa (ICD-9 Code: 185, ICD-10: C61), other cancer (ICD C00–C97), and BPH (ICD-9: 600, ICD-10: N40). Then, surgical procedures treating PCa and BPH were characterized using MEL codes for RP (MEL code: "JG050", "JG060", "JG070", "JG080") and transurethral resection of the prostate (TURP) (MEL code: "JG020"), respectively. Based on these characteristics, participants were categorized into one of the following three groups: 1) men with PCa and underwent RP: diagnosis of PCa; date of RP between 2013-2015, and age at RP  $\geq 45$  years; 2) cancer-free men with non-operated BPH: no diagnosis of any cancer; diagnosis of BPH between 2013-2015, did not undergo TURP; 3) cancer-free men without BPH: a randomly selected group of patients whose hospital stays were documented between 2013-2015; no PCa or BPH diagnoses documented; age at 1/1/2014 was  $\geq 45$  years.
