# Supplementary material for: Difference in Incontinence Pad Use between Patients after Radical Prostatectomy and Cancer-Free Population with Subgroup Analysis for Open vs. Minimally Invasive Radical Prostatectomy: A Descriptive Analysis of Insurance Claims-Based Data
Source: MDPI journal article supplement (doi:10.3390/ijerph18136891), 2021-06-27
Supplement: s1 [file s1]

S1 Supplementary Table: Poisson regression modelling post-operative monthly rate of prescribed incontinence pads adjusting for age group (45-<60, 60-<70, 70+) and pre-operative rates of prescribed incontinence pads by RP procedures.

|                   | RP-Open  |           |           |         | RP-minimally invasive |           |           |         |
|-------------------|----------|-----------|-----------|---------|-----------------------|-----------|-----------|---------|
| Parameter         | Estimate | Low 95%CI | Upp 95%CI | p-value | Estimate              | Low 95%CI | Upp 95%CI | p-value |
| Intercept         | 4.0904   | 3.7022    | 4.4786    | <.0001  | 5.2858                | 5.0498    | 5.5218    | <.0001  |
| Rate_before       | 17.7992  | 13.9108   | 21.6877   | <.0001  | 3.0723                | 1.7689    | 4.3757    | <.0001  |
| Age [Ref: 45-<60] |          |           |           |         |                       |           |           |         |
| 60-<70            | -0.8483  | -1.4387   | -0.2579   | 0.0049  | 0.341                 | 0.0572    | 0.6248    | 0.0185  |
| 70+               | -0.3273  | -1.0173   | 0.3628    | 0.3526  | 0.5344                | 0.2224    | 0.8464    | 0.0008  |
